## A Left sided site of origin is associated with adverse cardiovascular outcomes in patients with LV dysfunction undergoing PVC ablation

Penela D.<sup>1</sup>; Fernandez-Armentas J.<sup>2</sup>; Acosta J.<sup>3</sup>; Bisbal F.<sup>4</sup>; Jauregui B.<sup>1</sup>; Soto D.<sup>1</sup>; Aguinaga L.<sup>5</sup>; Acena M.<sup>6</sup>; Biagi A.<sup>7</sup>; De Sensi F.<sup>8</sup>; Ordoñez A.<sup>1</sup>; Chauca A.<sup>1</sup>; Carreno J.<sup>1</sup>; Berrueto A.<sup>1</sup>

<sup>1</sup>MEDICAL CENTRE TEKNON, GRUPO QUIRONSALUD, Barcelona, Spain

<sup>2</sup>University Hospital Puerta del Mar, Cadiz, Spain

<sup>3</sup>Complex Public Hospital Virgen del Rocío Regional, Sevilla, Spain, Spain

<sup>4</sup>Germans Trias i Pujol Hospital, Badalona, Spain

<sup>5</sup>Private Center of Cardiology, Tucuman, Argentina

<sup>6</sup>University Hospital of Bellvitge, Hospitalet De Llobregat, Spain

<sup>7</sup>Guglielmo da Saliceto Hospital, Piacenza, Italy

<sup>8</sup>Ospedale Misericordia, Grosseto, Italy

**Funding Acknowledgements:** Type of funding sources: None.

**Background:** Epidemiological studies suggested that premature ventricular complexes (PVCs) are associated with cardiac mortality. But data are still inconclusive.

**Aim:** This study sought to analyze predictors of adverse outcomes in a population of patients with left ventricular (LV) systolic dysfunction who underwent PVC ablation.

**Methods:** 135 consecutive patients [100 (74%) men, 59 ± 12 y.o.] with LV systolic dysfunction [LV ejection fraction (LVEF) <50%] and frequent PVCs who underwent PVC ablation were included in a multicenter prospective international register. Patients were followed-up at 6 and 12 months and annually thereafter. The last evaluation performed was considered the long-term follow-up (LTFUP) evaluation. Cardiac mortality and/or cardiac transplantation and/or admission for heart failure was considered the primary endpoint.

**Results:** 82 (61%) patients had a left-sided PVC's site of origin (LS-SOO), 51 (38%) had a right-sided SOO (RS-SOO) whereas SOO could not be determined in 2 (1%) patients. LS-SOO patients were older ( $61 \pm 11$  vs  $52 \pm 10$ ,  $p < 0.001$ ) more frequently men [71 (87%) vs 27 (53%),  $p < 0.001$ ] with previous history of atrial fibrillation (AF) [14 (15%) vs 0,  $p = 0.001$ ] and with a previously diagnosed structural heart disease (SHD) [43 (52%) vs 6 (11%),  $p < 0.001$ ].

After a mean follow-up of  $39 \pm 21$  months (range 24-94 months) there was a significant reduction in the PVC burden from  $24 \pm 13\%$  at baseline to  $4 \pm 6\%$  at LTFUP,  $p < 0.001$ ; LVEF improved from  $33 \pm 8\%$  at baseline to  $41 \pm 13\%$  at LTFUP ( $p < 0.001$ ) and NYHA class from  $2.1 \pm 0.6$  to  $1.4 \pm 0.6$  ( $p < 0.001$ ); BNP levels decreased from  $237 \pm 231$  pg/mL to  $137 \pm 185$  pg/mL ( $p = 0.001$ ). The primary end-point was reached in 10% patients (7 cardiac deaths, 1 cardiac transplantation and 5 heart failure admissions), 14,8% in LS-SOO and 1,9% in RS-SOO patients, log rank = 0.05 (Figure 1).

**Conclusions:** Among patients with LV dysfunction who underwent PVC ablation, those with LS-SOO were older and more frequently had AF and SHD. LS-SOO was associated with adverse cardiovascular outcomes. These findings suggest that PVCs with LS and RS-SOO should be considered as two different clinical entities, with different prognostic values.

Abstract Figure 1

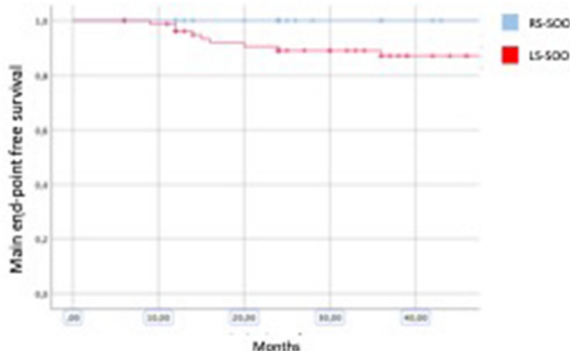

Source: http://academic.oup.com/europace/article-pdf/23/Supplement_3/euab116.334/38131084/euab116.334.pdf
